# Supplementary material for: Protective Efficacy and Mechanism of Passive Immunization with Polyclonal Antibodies in a Sepsis Model of Staphylococcus aureus Infection
Source: PubMed Central journal article supplement (PMC4614693; doi:10.1038/srep15553), 2015-10-22
Supplement: srep15553-s1.pdf [file srep15553-s1.pdf]

# **Protective Efficacy and Mechanism of Passive Immunization with Polyclonal Antibodies in a Sepsis Model of *Staphylococcus aureus* Infection**

Jinyong Zhang<sup>1,+</sup>, Feng Yang<sup>1,2,+</sup>, Xiaoli Zhang<sup>3</sup>, Haiming Jing<sup>1</sup>, Chunyan Ren<sup>1</sup>, Changzhi Cai<sup>1</sup>, Yandong Dong<sup>1</sup>, Yudong Zhang<sup>1</sup>, Quanming Zou<sup>1,\*</sup>, Hao Zeng<sup>1,\*</sup>

<sup>1</sup>National Engineering Research Center of Immunological Products, Department of Microbiology and Biochemical Pharmacy, College of Pharmacy, Third Military Medical University, Chongqing, 400038, PR China.

<sup>2</sup>College of Bioengineering, Chongqing University, Chongqing, 400044, PR China

<sup>3</sup>Department of Clinical Hematology, Southwest Hospital, Third Military Medical University, Chongqing, 400038, PR China.

<sup>+</sup>These authors contribute equally to this work.

<sup>\*</sup>Corresponding author: Quanming Zou, E-mail:[qmzou2007@163.com](mailto:qmzou2007@163.com).

Hao Zeng, E-mail:[zeng1109@163.com](mailto:zeng1109@163.com).

**Supplementary Fig. 1** Sequence alignment of Hla from MRSA252 with those from 4 clinical strains of *S. aureus*.

```

MRSA252_Hla 1 MKTRIVSSVTTLLLSILMNPVANAADSDINIKTGTDDIGSNTTVKTGDLVITYDKENGMHKKVFPYSFID
BJ_03_Hla 1 MKTRIVSSVTTLLLSILMNPVANAADSDINIKTGTDDIGSNTTVKTGDLVITYDKENGMHKKVFPYSFID
GZ_02_Hla 1 MKTRIVSSVTTLLLSILMNPVANAADSDINIKTGTDDIGSNTTVKTGDLVITYDKENGMHKKVFPYSFID
CQ_19_Hla 1 MKTRIVSSVTTLLLSILMNPVANAADSDINIKTGTDDIGSNTTVKTGDLVITYDKENGMHKKVFPYSFID
KM_22_Hla 1 MKTRIVSSVTTLLLSILMNPVANAADSDINIKTGTDDIGSNTTVKTGDLVITYDKENGMHKKVFPYSFID

MRSA252_Hla 71 DKNHNKKLVIRTKGTIAGQYRVYSEGANKSGLAWPSAFKVQLQLPDNEVAQISDYYPNRSIDTKEYMS
BJ_03_Hla 71 DKNHNKKLVIRTKGTIAGQYRVYSEGANKSGLAWPSAFKVQLQLPDNEVAQISDYYPNRSIDTKEYMS
GZ_02_Hla 71 DKNHNKKLVIRTKGTIAGQYRVYSEGANKSGLAWPSAFKVQLQLPDNEVAQISDYYPNRSIDTKEYMS
CQ_19_Hla 71 DKNHNKKLVIRTKGTIAGQYRVYSEGANKSGLAWPSAFKVQLQLPDNEVAQISDYYPNRSIDTKEYMS
KM_22_Hla 71 DKNHNKKLVIRTKGTIAGQYRVYSEGANKSGLAWPSAFKVQLQLPDNEVAQISDYYPNRSIDTKEYMS

MRSA252_Hla 140 FLTYGFNGNVTGDDSGKIGGLIGANVSIHTLKYVQPDFKTILESPTDKKVGWQKVI FNNMNVQNNGPYDR
BJ_03_Hla 141 FLTYGFNGNVTGDDSGKIGGLIGANVSIHTLKYVQPDFKTILESPTDKKVGWQKVI FNNMNVQNNGPYDR
GZ_02_Hla 141 FLTYGFNGNVTGDDSGKIGGLIGANVSIHTLKYVQPDFKTILESPTDKKVGWQKVI FNNMNVQNNGPYDR
CQ_19_Hla 141 FLTYGFNGNVTGDDSGKIGGLIGANVSIHTLKYVQPDFKTILESPTDKKVGWQKVI FNNMNVQNNGPYDR
KM_22_Hla 141 FLTYGFNGNVTGDDSGKIGGLIGANVSIHTLKYVQPDFKTILESPTDKKVGWQKVI FNNMNVQNNGPYDR

MRSA252_Hla 210 DSWNPVYGNQLFMKTRNGSMKAAENFLDPNKASSLLSSGFSPPDFATVITMDRKAISKQQTNIDVIYERVD
BJ_03_Hla 211 DSWNPVYGNQLFMKTRNGSMKAAENFLDPNKASSLLSSGFSPPDFATVITMDRKAISKQQTNIDVIYERVD
GZ_02_Hla 211 DSWNPVYGNQLFMKTRNGSMKAAENFLDPNKASSLLSSGFSPPDFATVITMDRKAISKQQTNIDVIYERVD
CQ_19_Hla 211 DSWNPVYGNQLFMKTRNGSMKAAENFLDPNKASSLLSSGFSPPDFATVITMDRKAISKQQTNIDVIYERVD
KM_22_Hla 211 DSWNPVYGNQLFMKTRNGSMKAAENFLDPNKASSLLSSGFSPPDFATVITMDRKAISKQQTNIDVIYERVD

MRSA252_Hla 280 DYQLHWTSTNWKGTNTKDKWTDRSSERYKIDWEKEEMTN
BJ_03_Hla 281 DYQLHWTSTNWKGTNTKDKWTDRSSERYKIDWEKEEMTN
GZ_02_Hla 281 DYQLHWTSTNWKGTNTKDKWTDRSSERYKIDWEKEEMTN
CQ_19_Hla 281 DYQLHWTSTNWKGTNTKDKWTDRSSERYKIDWEKEEMTN
KM_22_Hla 281 DYQLHWTSTNWKGTNTKDKWTDRSSERYKIDWEKEEMTN

```

**Supplementary Fig. 2** Sequence alignment of MntC from MRSA252 with those from 4 clinical strains of *S. aureus*.

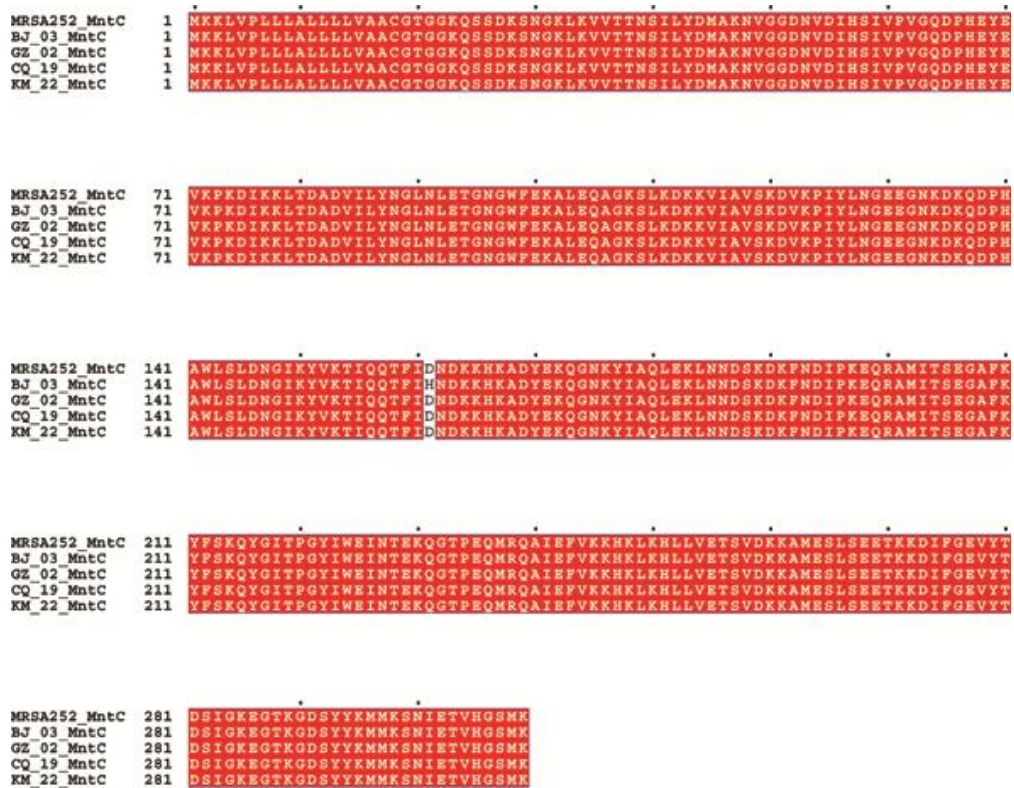

**Supplementary Fig. 3** Sequence alignment of SEB from MRSA252 with those from 4 clinical strains of *S. aureus*.

```

MRSA252_SEB 1 MYKRLFISHVILIFVLILVISTPNVLAESQDPKPKDELHKSSKFTGLMENMKVLYDDNHVSAINVKSIDQ
BJ_03_SEB 1 MYKRLFISHVILIFVLILVISTPNVLAESQDPKPKDELHKSSKFTGLMENMKVLYDDNHVSAINVKSIDQ
GZ_02_SEB 1 MYKRLFISHVILIFVLILVISTPNVLAESQDPKPKDELHKSSKFTGLMENMKVLYDDNHVSAINVKSIDQ
CQ_19_SEB 1 MYKRLFISHVILIFVLILVISTPNVLAESQDPKPKDELHKSSKFTGLMENMKVLYDDNHVSAINVKSIDQ
KM_22_SEB 1 MYKRLFISHVILIFVLILVISTPNVLAESQDPKPKDELHKSSKFTGLMENMKVLYDDNHVSAINVKSIDQ

MRSA252_SEB 71 RRYFDLIYSIKDTKCLGNVDNVRVEFKNKDLADKYYDKYVDVFGANAYYQCAFPSKKTNDINSHQTDKRKTC
BJ_03_SEB 71 RRYFDLIYSIKDTKCLGNVDNVRVEFKNKDLADKYYDKYVDVFGANAYYQCAFPSKKTNDINSHQTDKRKTC
GZ_02_SEB 71 RRYFDLIYSIKDTKCLGNVDNVRVEFKNKDLADKYYDKYVDVFGANAYYQCAFPSKKTNDINSHQTDKRKTC
CQ_19_SEB 71 RRYFDLIYSIKDTKCLGNVDNVRVEFKNKDLADKYYDKYVDVFGANAYYQCAFPSKKTNDINSHQTDKRKTC
KM_22_SEB 71 RRYFDLIYSIKDTKCLGNVDNVRVEFKNKDLADKYYDKYVDVFGANAYYQCAFPSKKTNDINSHQTDKRKTC

MRSA252_SEB 141 MYGGVTEHNGNQLDKYRSITVRVFEDEGKNLLSFDVQTNKKKVTAGELDYLTRHYLVKNNKLYEFNNSPYE
BJ_03_SEB 141 MYGGVTEHNGNQLDKYRSITVRVFEDEGKNLLSFDVQTNKKKVTAGELDYLTRHYLVKNNKLYEFNNSPYE
GZ_02_SEB 141 MYGGVTEHNGNQLDKYRSITVRVFEDEGKNLLSFDVQTNKKKVTAGELDYLTRHYLVKNNKLYEFNNSPYE
CQ_19_SEB 141 MYGGVTEHNGNQLDKYRSITVRVFEDEGKNLLSFDVQTNKKKVTAGELDYLTRHYLVKNNKLYEFNNSPYE
KM_22_SEB 141 MYGGVTEHNGNQLDKYRSITVRVFEDEGKNLLSFDVQTNKKKVTAGELDYLTRHYLVKNNKLYEFNNSPYE

MRSA252_SEB 211 TGYIKFIEINENSFYDMMMPAPGDKFDQSKYLMMYNDNKKMVDSDKVKEVYLTTKKK
BJ_03_SEB 211 TGYIKFIEINENSFYDMMMPAPGDKFDQSKYLMMYNDNKKMVDSDKVKEVYLTTKKK
GZ_02_SEB 211 TGYIKFIEINENSFYDMMMPAPGDKFDQSKYLMMYNDNKKMVDSDKVKEVYLTTKKK
CQ_19_SEB 211 TGYIKFIEINENSFYDMMMPAPGDKFDQSKYLMMYNDNKKMVDSDKVKEVYLTTKKK
KM_22_SEB 211 TGYIKFIEINENSFYDMMMPAPGDKFDQSKYLMMYNDNKKMVDSDKVKEVYLTTKKK

```

**Supplementary Table 1.** The information of *S. aureus* clinical strains used in this study.

| Strain name | Source of strain             | Department         | Patient's name | Gender | Age | Source of sample | Nuc gene <sup>#</sup> | mecA gene <sup>*</sup> | Genotyping <sup>‡</sup> |
|-------------|------------------------------|--------------------|----------------|--------|-----|------------------|-----------------------|------------------------|-------------------------|
| BJ-02       | Beijing 263 hospital         | Respiratory        | Zhang××        | Female | 69  | Sputum           | +                     | +                      | ST239-t437-SCCmecIII    |
| CQ-19       | Chongqing southwest hospital | ICU                | Liu×           | Female | 22  | Blood            | +                     | +                      | ST398-t030-SCCmecIII    |
| GZ-02       | Guangzhou nanfang hospital   | Traumatic fracture | Zhang×         | male   | 21  | Puncture fluid   | +                     | +                      | ST5-t037-SCCmecIV       |
| KM-22       | Kunming medical college      | Burns surgery      | Lu××           | male   | 4   | Secretions       | +                     | -                      | ST121-t030              |

<sup>#</sup> nuc gene, which encode the thermonuclease, has been widely used as a specific marker to detect *S. aureus* by PCR-based methods.

<sup>\*</sup>The product of mecA gene is penicillin-binding protein, which resulting in multiple drug resistance.

<sup>‡</sup>Three Genotyping methods were used in this study, including the multiple locus sequence typing (ST), Staphylococcal Protein A genetic polymorphism analysis (t) and classification of Staphylococcal cassette chromosome mec (SCCmec).
